# Supplementary material
Source: MDPI journal article supplement (https://www.mdpi.com/2072-4292/16/10/1709)
Supplement: s1 [file s1]

Additional References for the supplementary Table S5

[Chudley and Willis, 2018; Ke et al., 2022; Sevestre and Benn, 2015; Yasuda and Furuya, 2015]

Chudley, T. R., and I. C. Willis (2018), Glacier surges in the north-west West Kunlun Shan inferred from 1972 to 2017 Landsat imagery, *Journal of Glaciology*, 65(249), 1-12, doi:10.1017/jog.2018.94.

Ke, L., J. Zhang, C. Fan, J. Zhou, and C. Song (2022), Large-Scale Monitoring of Glacier Surges by Integrating High-Temporal- and -Spatial-Resolution Satellite Observations: A Case Study in the Karakoram, *Remote Sensing*, 14(18), doi:10.3390/rs14184668.

Sevestre, H., and D. I. Benn (2015), Climatic and geometric controls on the global distribution of surge-type glaciers: implications for a unifying model of surging, *Journal of Glaciology*, 61(228), 646-662, doi:10.3189/2015JoG14J136.

Yasuda, T., and M. Furuya (2015), Dynamics of surge-type glaciers in West Kunlun Shan, Northwestern Tibet, *Journal of Geophysical Research-Earth Surface*, 120(11), 2393-2405, doi:10.1002/2015jf003511.
