# Supplementary material
Source: MDPI journal article supplement (https://www.mdpi.com/2072-4292/16/10/1709)
Supplement: s1 [file s1]

Additional references for the supplementary Table S9

[Zhou et al., 2019]  
[X R Zhao et al., 2020]  
[Tian et al., 2014]  
[Bolch et al., 2008]  
[Zong et al., 2014]  
[Zhu et al., 2014]  
[O. King et al., 2017; Yao et al., 2012]  
[R Zhao, 2015]  
[Li et al., 2018]  
[Li and Lin, 2017]  
[Y Liu et al., 2012]  
[Cao et al., 2019b]  
[P K Garg et al., 2022a]  
[L Liu et al., 2020]  
[Luo et al., 2020]  
[Shangguan et al., 2010]  
[S Garg et al., 2022b]  
[Zhang et al., 2020]  
[Wang et al., 2013]  
[L Liu et al., 2019]  
[Owen King et al., 2020]  
[Wu et al., 2018; Wu et al., 2020]  
[Cao et al., 2019a; Cao et al., 2019c]

Bolch, T., M. F. Buchroithner, J. Peters, M. Baessler, and S. Bajracharya (2008), Identification of glacier motion and potentially dangerous glacial lakes in the Mt. Everest region/Nepal using spaceborne imagery, *Natural Hazards and Earth System Sciences*, 8(6), 1329-1340, doi:10.5194/nhess-8-1329-2008.

Cao, B., B. Pan, W. Guan, Z. Wen, and J. Wang (2019a), Changes in glacier volume on Mt. Gongga, southeastern Tibetan Plateau, based on the analysis of multi-temporal DEMs from 1966 to 2015, *J. Glaciol.*, 65(251), 366-375, doi:10.1017/jog.2019.14.

Cao, B., B. Pan, Z. Wen, W. Guan, and K. Li (2019b), Changes in glacier mass in the Lenglongling Mountains from 1972 to 2016 based on remote sensing data and modeling, *Journal of hydrology*, 578, 124010.

Cao, B., B. Pan, Z. Wen, W. Guan, and K. Li (2019c), Changes in glacier mass in the Lenglongling Mountains from 1972 to 2016 based on remote sensing data and modeling, *Journal of Hydrology*, 578, doi:10.1016/j.jhydrol.2019.124010.

Garg, P. K., J. S. Yadav, S. K. Rai, and A. Shukla (2022a), Mass balance and morphological evolution of the Dokriani Glacier, central Himalaya, India during 1999–2014, *Geoscience Frontiers*, 13(1), 101290.

Garg, S., A. Shukla, P. K. Garg, B. Yousuf, and U. K. Shukla (2022b), Surface evolution and dynamics of the Kangriz glacier, western Himalaya in past 50 years, *Cold Regions Science and Technology*, 196, 103496.

King, O., A. Bhattacharya, S. Ghuffar, A. Tait, S. Guilford, A. C. Elmore, and T. Bolch (2020), Six Decades of Glacier Mass Changes around Mt. Everest Are Revealed by Historical and Contemporary Images, *One Earth*, 3(5), 608–620, doi:10.1016/j.oneear.2020.10.019.

King, O., D. J. Quincey, J. L. Carrivick, and A. V. Rowan (2017), Spatial variability in mass change of glaciers in the Everest region, central Himalaya, between 2000 and 2015, *The Cryosphere*, 2017(11), 407–426, doi:10.5194/tc-2016-99.

Li, G., and H. Lin (2017), Recent decadal glacier mass balances over the Western Nyainqentanglha Mountains and the increase in their melting contribution to Nam Co Lake measured by differential bistatic SAR interferometry, *Global and Planetary Change*, 149, 177–190.

Li, G., H. Lin, and Q. Ye (2018), Heterogeneous decadal glacier downwasting at the Mt. Everest (Qomolangma) from 2000 to ~ 2012 based on multi-baseline bistatic SAR interferometry, *Remote Sensing of Environment*, 206, 336–349, doi:https://doi.org/10.1016/j.rse.2017.12.032.

Liu, L., L. Jiang, H. Jiang, H. Wang, N. Ma, and H. Xu (2019), Accelerated glacier mass loss (2011–2016) over the Puruogangri ice field in the inner Tibetan Plateau revealed by bistatic InSAR measurements, *Remote Sens Environ*, 231, doi:10.1016/j.rse.2019.111241.

Liu, L., L. Jiang, Z. Zhang, H. Wang, and X. Ding (2020), Recent Accelerating Glacier Mass Loss of the Geladandong Mountain, Inner Tibetan Plateau, Estimated from ZiYuan-3 and TanDEM-X Measurements, *Remote Sens-Basel*, 12(3).

Liu, Y., X. Qin, T. Zhang, M. Zhang, and W. Du (2012), Variation of the Ningchan River Glacier No.3 in the Lenglongling Range, East Qilian Mountains, *Journal of Glaciology and Geocryology (In Chinese with English abstract)*, 34(5), 1031–1036.

Luo, W., G. Zhang, W. Chen, and F. Xu (2020), Response of glacial lakes to glacier and climate changes in the western Nyainqentanglha range, *Sci. Total Environ.*, 735, 139607.

Shangguan, D., S. Liu, Y. Ding, Y. Zhang, J. Li, X. Li, and Z. Wu (2010), Changes in the elevation and extent of two glaciers along the Yanglonghe river, Qilian Shan, China, *J. Glaciol.*, 56(196), 309–317.

Tian, L. D., J. B. Zong, T. D. Yao, L. L. Ma, J. C. Pu, and D. Y. Zhu (2014), Direct measurement of glacier thinning on the southern Tibetan Plateau (Gurenhekou, Kangwure and Naimona'Nyi glaciers), *J. Glaciol.*, 60(223), 879–888, doi:10.3189/2014JoG14J022.

Wang, Y., J. Ren, D. Qin, and X. Qin (2013), Regional glacier volume changes derived from satellite data: A case study in the Qilian Mountains, *J. Glaciol. Geocryol*, 35, 583–592.

Wu, K., S. Liu, Z. Jiang, J. Xu, J. Wei, and W. Guo (2018), Recent glacier mass balance and area changes in the Kangri Karpo Mountains from DEMs and glacier inventories, *Cryosphere*, 12(1), 103–121, doi:10.5194/tc-12-103-2018.

Wu, K., S. Liu, J. Xu, Y. Zhu, Q. Liu, Z. Jiang, and J. Wei (2020), Spatiotemporal variability of surface velocities of monsoon temperate glaciers in the Kangri Karpo Mountains, southeastern Tibetan Plateau, *J. Glaciol.*, 67(261).

- Yao, T. D., et al. (2012), Different glacier status with atmospheric circulations in Tibetan Plateau and surroundings, *Nat Clim Change*, 2(9), 663—667, doi:10.1038/nclimate1580.
- Zhang, Z., Z. H. Du, S. Y. Liu, Z. L. Jiang, D. H. Shangguan, J. F. Wei, J. L. Xu, and S. S. Zhang (2020), Glacier mass changes over Duxueshan, Burog Kangri, and Zangser Kangri in the Inner Tibetan Plateau, *Environ Earth Sci*, 79(12).
- Zhao, R. (2015), Spatial-temporal characteristic of glacier volume changes in Mt. Xixabangma region monitored by remote sensing techniques (In Chinese with English abstract), 85 pp, University of Chinese Academy of Science, Beijing.
- Zhao, X. R., X. Wang, J. F. Wei, Z. L. Jiang, Y. Zhang, and S. Y. Liu (2020), Spatiotemporal variability of glacier changes and their controlling factors in the Kanchenjunga region, Himalaya based on multi-source remote sensing data from 1975 to 2015, *Sci. Total Environ.*, 745, 12, doi:10.1016/j.scitotenv.2020.140995.
- Zhou, Y. S., J. Hu, Z. W. Li, J. Li, R. Zhao, and X. L. Ding (2019), Quantifying glacier mass change and its contribution to lake growths in central Kunlun during 2000-2015 from multi-source remote sensing data, *Journal of Hydrology*, 570, 38-50, doi:10.1016/j.jhydrol.2019.01.007.
- Zhu, D., L. Tian, J. Wang, Y. Wang, and J. Cui (2014), Rapid glacier retreat in the Naimona'Nyi region, western Himalayas, between 2003 and 2013, *Journal of Applied Remote Sensing*, 8, doi:10.1117/1.jrs.8.083508.
- Zong, J., Q. Ye, and L. Tian (2014), Recent Naimona'Nyi Glacier surface elevation changes on the Tibetan Plateau based on ICESat/GLAS, SRTM DEM and GPS measurements, *Chinese Science Bulletin (Chinese Version)*, 59(21), 2108, doi:10.1360/972013-1243.
